# Supplementary material for: Engineering g-C3N4 composited Fe-UIO-66 to in situ generate robust single-atom Fe sites for high-performance PEMFC and Zn–air battery
Source: Royal Society of Chemistry journal article supplement (doi:10.1039/d2ta07962c), 2022-11-18
Supplement: d2ta07962c1.pdf [file d2ta07962c1.pdf]

## **Engineering g-C<sub>3</sub>N<sub>4</sub> composited Fe-UIO-66 to in-situ generate robust single-atom Fe sites for high-performance PEMFC and Zn-air battery**

Lu An<sup>a,1</sup>, Bin Chi<sup>a,1</sup>, Yingjie Deng<sup>a</sup>, Chao Chen<sup>a</sup>, Xiaohua Deng<sup>a</sup>, Ranjie Zeng<sup>a</sup>, Yuying Zheng<sup>a</sup>, Dai Dang<sup>a\*</sup>, Xu Yang<sup>a\*</sup>, Xinlong Tian<sup>b\*</sup>

<sup>a</sup> *School of Chemical Engineering and Light Industry, Guangdong University of Technology, Guangzhou, 510006, P. R. China*

<sup>b</sup> *State Key Laboratory of Marine Resource Utilization in South China Sea, Hainan Provincial Key Lab of Fine Chemistry, School of Chemical Engineering and Technology, Hainan University, Haikou 570228, China*

\*Corresponding author E-mail address: dangdai@gdut.edu.cn

<sup>1</sup> Lu An and Bin Chi contributed equally to this work.

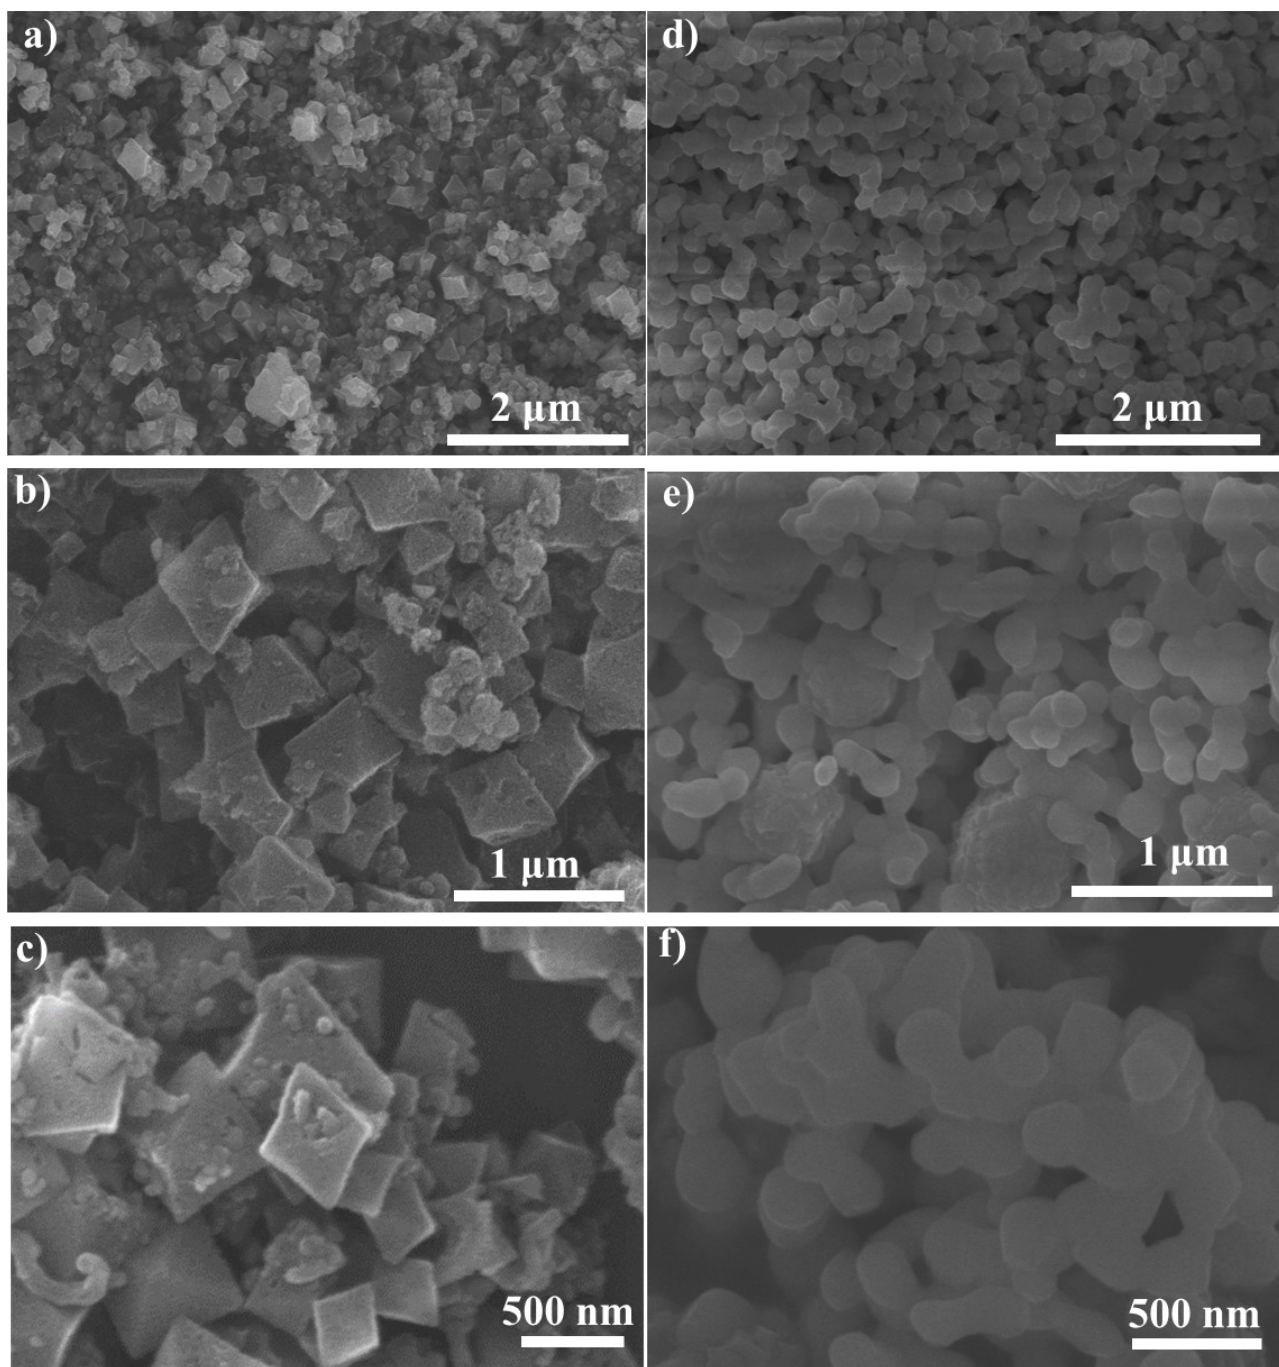

**Fig.S1.** SEM images of a-c) Fe-N/MC, d-f) Fe-N/C-ref at different scales.

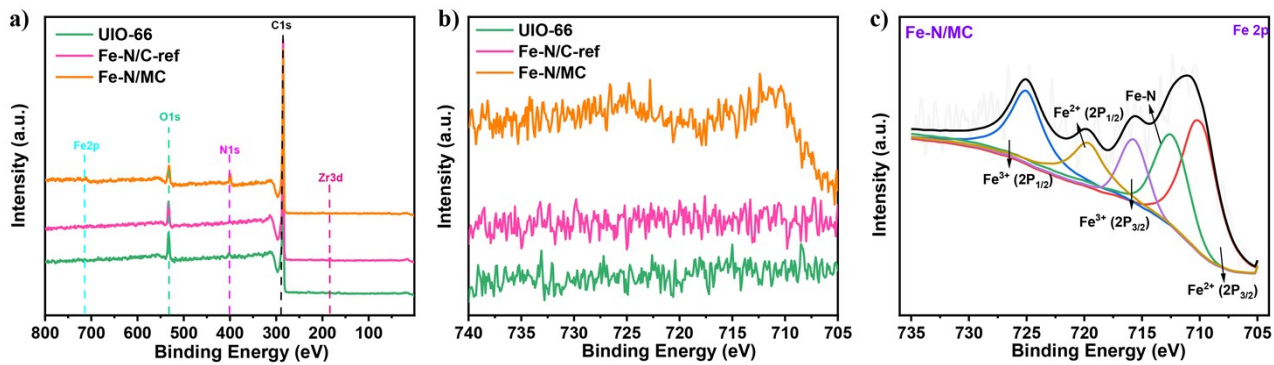

**Fig.S2** a) Survey XPS spectra, high-resolution; b) Fe<sub>2p</sub> XPS spectra of UIO, Fe-N/C-ref, Fe-N/MC; c) Fe<sub>2p</sub> XPS spectra of Fe-N/MC.

**Table S1.** Fraction of the different elements present in UIO, Fe-N/C-ref, and Fe-N/MC.

| <b>Sample</b> | <b>C %</b> | <b>N %</b> | <b>Fe %</b> |
|---------------|------------|------------|-------------|
| UIO-66        | 97.98      | 2.02       | /           |
| Fe-N/C-ref    | 97.77      | 1.91       | 0.32        |
| Fe-N/MC       | 97.21      | 2.21       | 0.67        |

**Table S2.** Fraction of the different N species present in UIO, Fe-N/C-ref, and Fe-N/MC.

| <b>Sample</b> | <b>Pyridinic N<br/>%</b> | <b>Fe-N<sub>x</sub><br/>%</b> | <b>Pyrrolic-N<br/>%</b> | <b>Graphitic-N<br/>%</b> | <b>Oxidized-N<br/>%</b> |
|---------------|--------------------------|-------------------------------|-------------------------|--------------------------|-------------------------|
| UIO-66        | 10.41                    | /                             | 37.23                   | 14.28                    | 38.48                   |
| Fe-N/C-ref    | 11.44                    | 6.97                          | 27.86                   | 16.94                    | 42.28                   |
| Fe-N/MC       | 26.06                    | 9.51                          | 16.25                   | 23.33                    | 27.88                   |

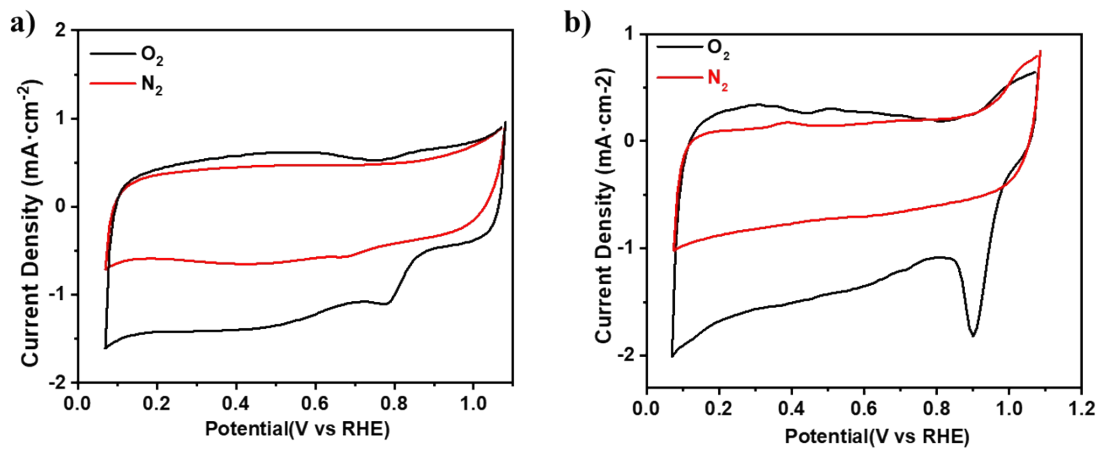

**Fig.S3** CV curves of Fe-N/MC in  $\text{N}_2$  and  $\text{O}_2$ -saturated a) 0.1 M  $\text{HClO}_4$  and b) 0.1 M  $\text{KOH}$ .

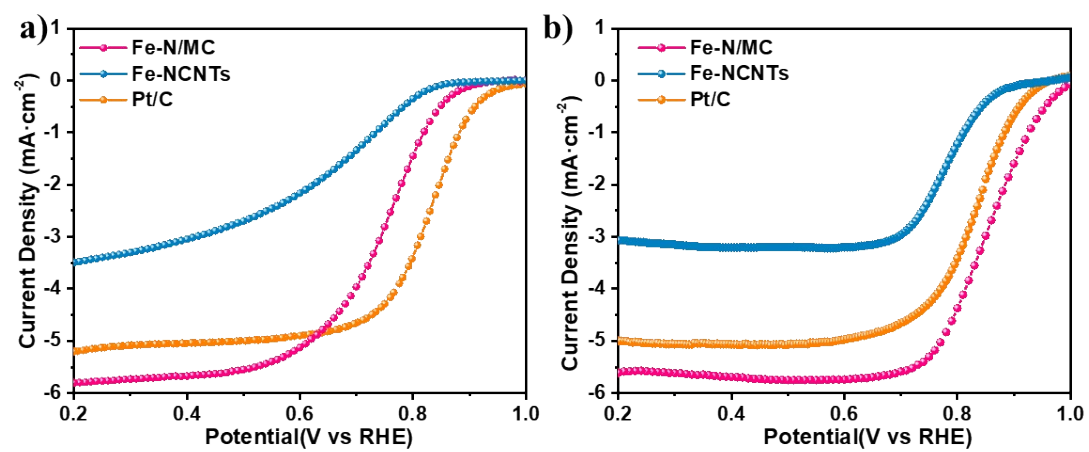

**Fig.S4** LSV ORR curves of Fe-NCNTs in  $O_2$ - saturated a) 0.1 M  $HClO_4$  and b) 0.1 M  $KOH$ .

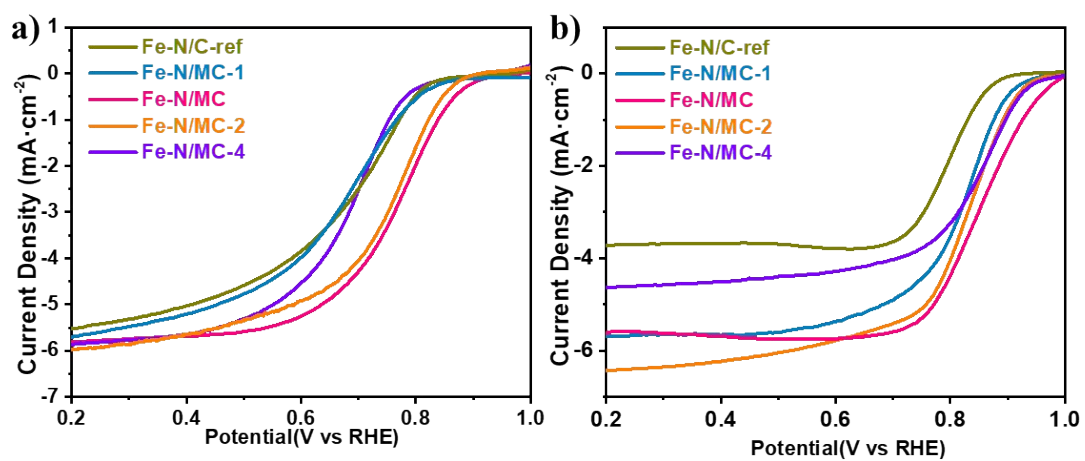

**Fig.S5** LSV ORR curves of Catalysts with FeCp with different doping levels in  $\text{O}_2$ - saturated a) 0.1 M  $\text{HClO}_4$  and b) 0.1 M KOH.



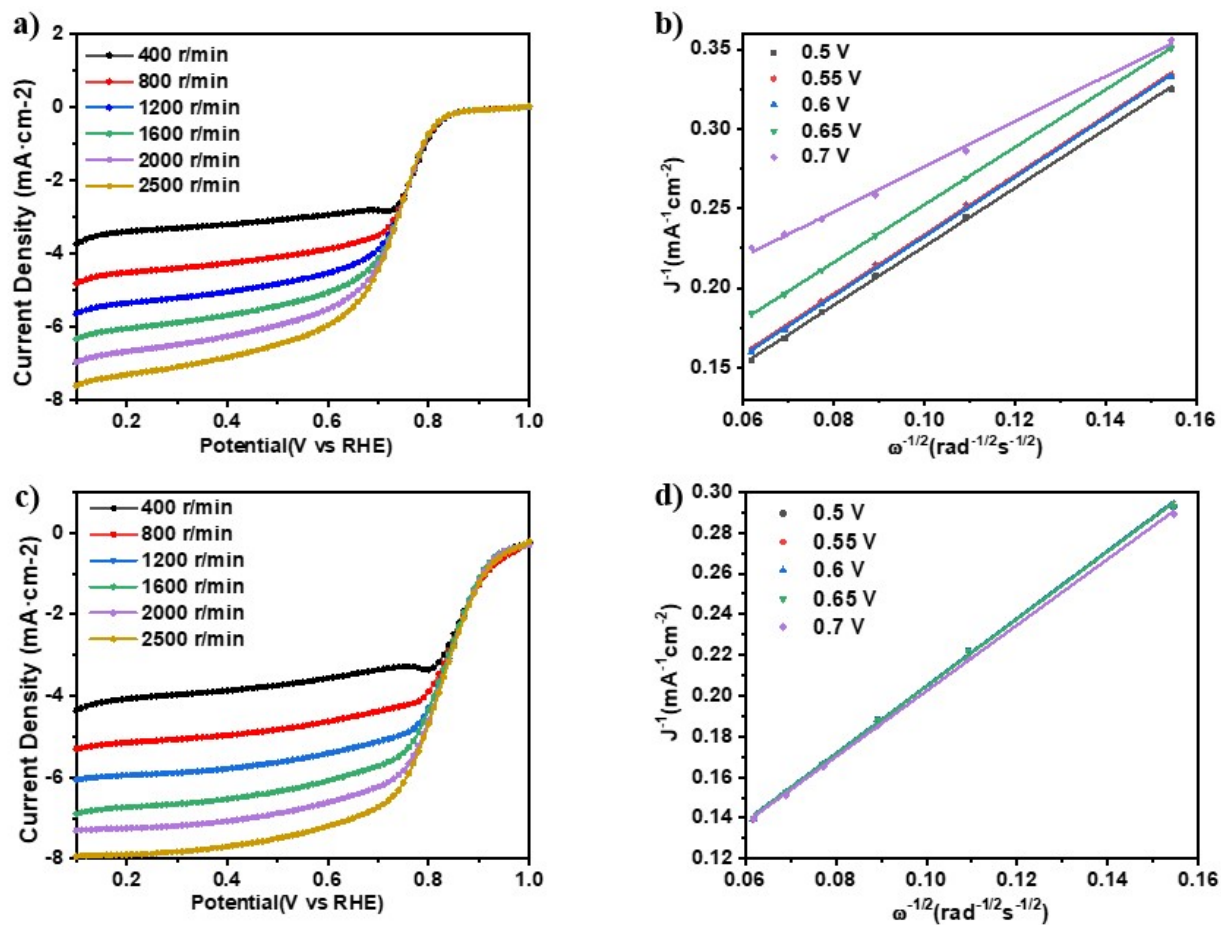

**Fig.S6** ORR curves of Fe-N/MC obtained at different rotation rates in  $O_2$ -saturated a) 0.1 M  $HClO_4$  and c) KOH; K-L plots of  $j^{-1}$  versus  $\omega^{-1/2}$  on Fe-N/MC in  $O_2$ -saturated b) 0.1 M  $HClO_4$  and d) KOH.

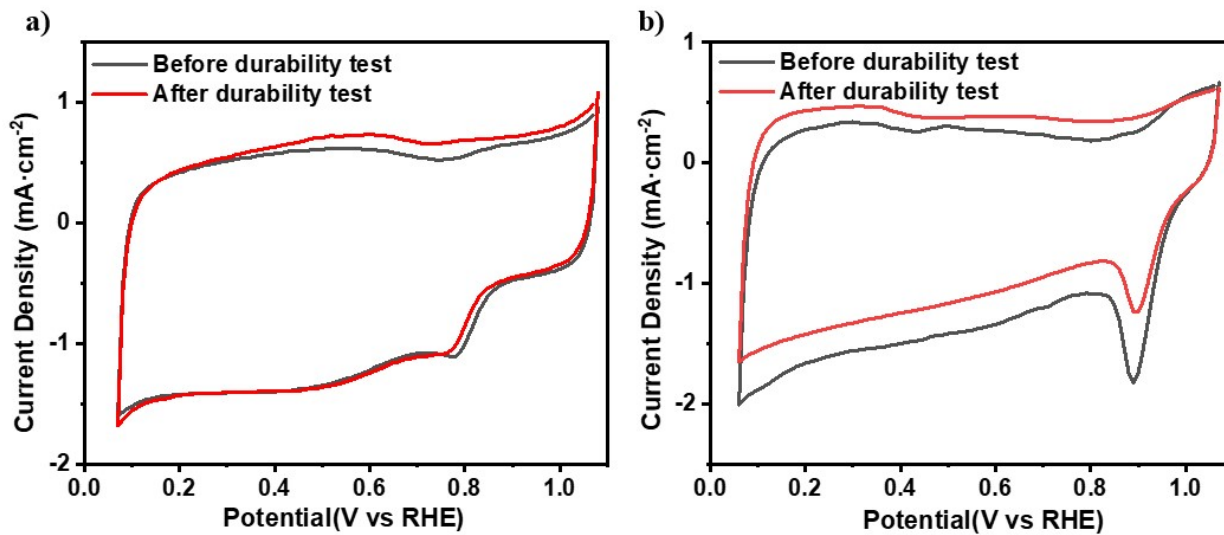

**Fig.S7** CV curves before and after durability test of Fe-N/MC in  $\text{O}_2$ -saturated a) 0.1 M  $\text{HClO}_4$  and b) KOH.

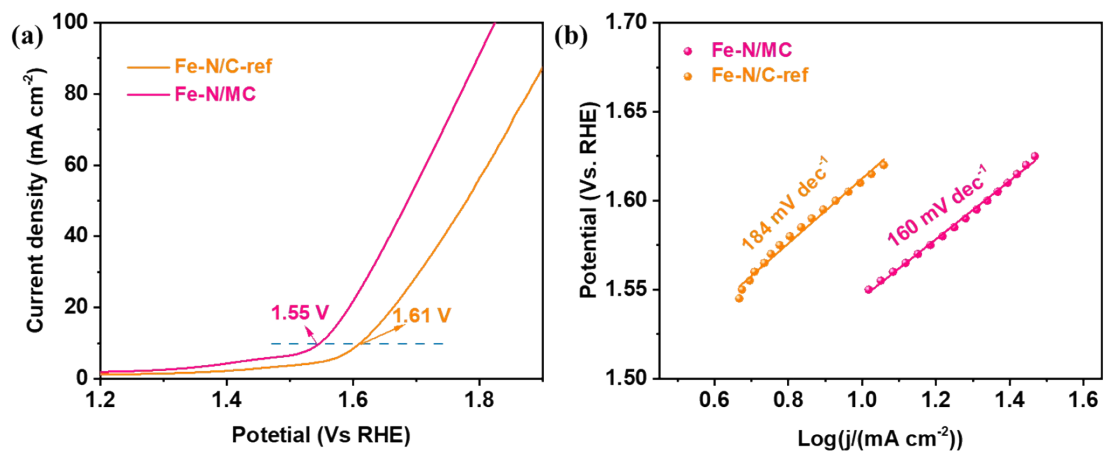

**Fig. S8** In 1 M KOH, (a) LSV curves for the OER of Fe-N/MC catalysts and Fe-N/C-ref catalysts at a scan rate of  $10 \text{ mV s}^{-1}$ . (b) Tafel slope plot.

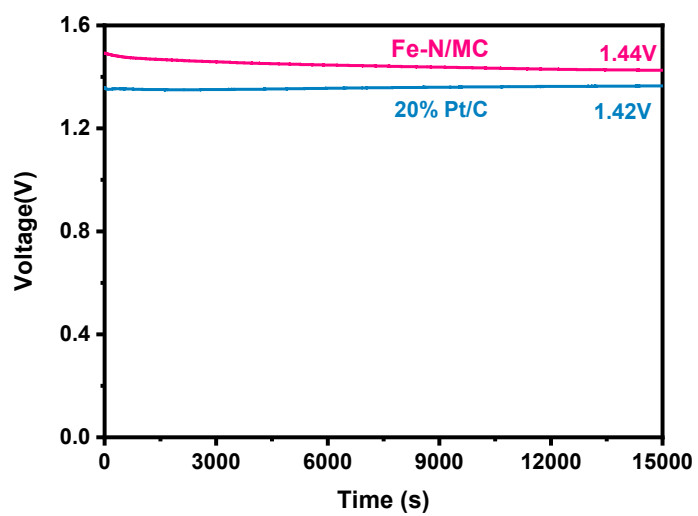

**Fig.S9** Open-circuit plots of Zn-air battery with Fe-N/MC and 20% Pt/C as the air cathode, respectively.

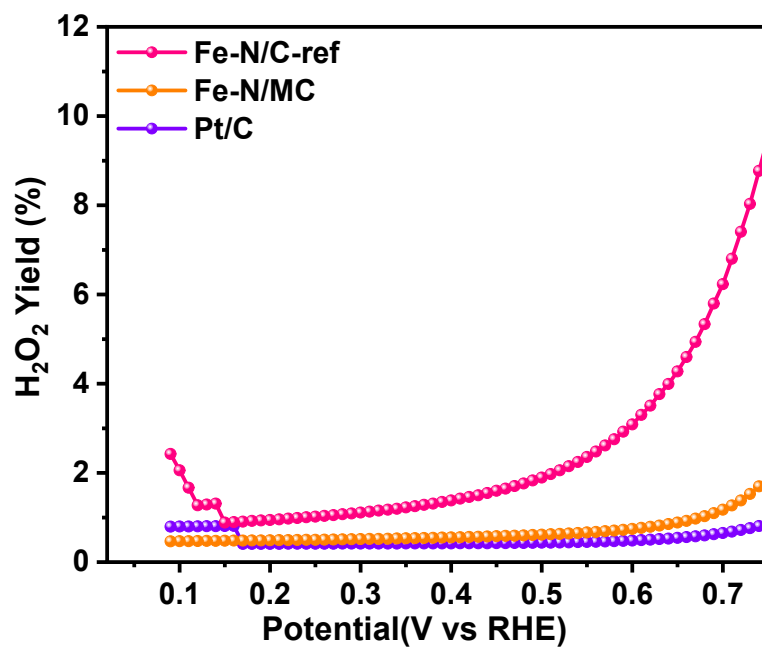

**Fig.S10** Hydrogen peroxide yields obtained from RRDE test results of Fe-N/C-ref, Fe-N/MC and Pt/C catalysts in oxygen-saturated 0.1 M HClO<sub>4</sub> solution.

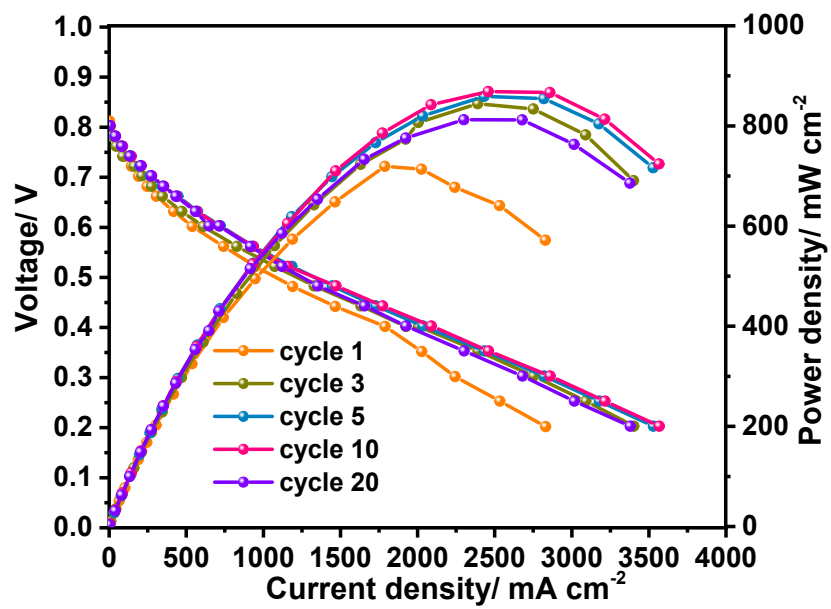

Fig.S11. IV curves of Fe-N/MC MEA after 24h discharging test

**Table S3.** Comparison of ORR performance of Fe-N/MC with other non-noble metal in alkaline medium

| Catalyst                                     | $E_{\text{onset}}$ vsRHE | $E_{1/2}$ vsRHE | Catalyst loading (mg/cm <sup>2</sup> ) | References       |
|----------------------------------------------|--------------------------|-----------------|----------------------------------------|------------------|
| <b>Fe-N/MC</b>                               | <b>0.95</b>              | <b>0.85</b>     | <b>0.5</b>                             | <b>This work</b> |
| Fe/N/S-PC                                    | 0.97                     | 0.87            | 0.5                                    | 1                |
| Fe/N/C(4mlm)-OAc                             | 0.95                     | 0.844           | 0.6                                    | 2                |
| Fe-N/C-155                                   | 1.09                     | 0.85            | 0.5                                    | 3                |
| FeN/C-800                                    | 0.923                    | 0.809           | 0.1                                    | 4                |
| Co/N/C                                       | 0.94                     | 0.83            | 0.2                                    | 5                |
| Fe <sub>3</sub> C@NG-800-0.2                 | 0.98                     | 0.83            | 0.5                                    | 6                |
| Fe/N/C                                       | 0.94                     | 0.83            | 0.5                                    | 7                |
| Fe-N/C                                       | 1.019                    | 0.848           | /                                      | 8                |
| Fe <sub>3</sub> -NG                          | 0.965                    | 0.826           | 0.5                                    | 9                |
| C-FeHZ8@g-C <sub>3</sub> N <sub>4</sub> -950 | 0.97                     | 0.845           | 0.5                                    | 10               |

**Table S4.** Comparison of ORR performance of Fe-N/MC with other non-noble metal in acid medium

| <b>Catalyst</b>               | <b><math>E_{\text{onset vsRHE}}</math></b> | <b><math>E_{1/2 \text{ vsRHE}}</math></b> | <b>Catalyst loading<br/>(<math>\text{mg}/\text{cm}^2</math>)</b> | <b>References</b> |
|-------------------------------|--------------------------------------------|-------------------------------------------|------------------------------------------------------------------|-------------------|
| <b>Fe-N/MC</b>                | <b>0.88</b>                                | <b>0.76</b>                               | <b>0.5</b>                                                       | <b>This work</b>  |
| PpPD-Fe-C                     | 0.826                                      | 0.718                                     | 0.9                                                              | 11                |
| PCN-FeCo/C                    | 0.90                                       | 0.76                                      | 0.6                                                              | 12                |
| C-FeZIF-900-0.84              | 0.90                                       | 0.77                                      | 0.5                                                              | 13                |
| N, P-CGHNs                    | 0.90                                       | 0.68                                      | 0.6                                                              | 14                |
| Fe-N-CNF                      | 0.84                                       | 0.62                                      | 0.6                                                              | 15                |
| FeN <sub>4</sub> /HOPC-c-1000 | /                                          | 0.8                                       | 0.5                                                              | 16                |
| CeF <sub>3</sub> -Fe/N/C      | 0.9                                        | 0.78                                      | 0.5                                                              | 17                |
| Zn/Co(mlm) <sub>2</sub> -P    | 0.88                                       | 0.76                                      | 0.5                                                              | 18                |
| Py-B12/C                      | /                                          | 0.78                                      | 0.5                                                              | 19                |
| SiO <sub>2</sub> -Fe/N/C      | /                                          | 0.823                                     | 0.5                                                              | 20                |



**Table S5.** Comparison of performance of the H<sub>2</sub>/O<sub>2</sub> PEMFCs using the NPM cathode catalysts

| <b>Catalyst</b>                            | <b>Operation temperature (°C)</b> | <b>Catalyst loading amount(mg cm<sup>-2</sup>)</b> | <b>Maximum power density (mW cm<sup>-2</sup>)</b> | <b>Back Pressure(bar)</b> | <b>References</b> |
|--------------------------------------------|-----------------------------------|----------------------------------------------------|---------------------------------------------------|---------------------------|-------------------|
| <b>Fe-N/MC</b>                             | <b>70</b>                         | <b>4.0</b>                                         | <b>1150</b>                                       | <b>2</b>                  | <b>This work</b>  |
| Fe/N/C-SCN                                 | 80                                | 4.0                                                | 1030                                              | 2                         | 21                |
| CFeHZ8@gC <sub>3</sub> N <sub>4</sub> -950 | 80                                | 1.0                                                | 775                                               | 2                         | 10                |
| Co-N-C@F127                                | 80                                | 4                                                  | 870                                               | 1                         | 22                |
| (CM+PANI)-Fe-C                             | 80                                | 4                                                  | 940                                               | 2                         | 23                |
| ZIF-FA-CNT-p                               | 80                                | 4.5                                                | 820                                               | 2                         | 24                |
| Fe/N/C(4mlm)-OAc                           | 80                                | 3                                                  | 1330                                              | 2                         | 3                 |
| SiO <sub>2</sub> -Fe/N/C                   | 80                                | 2.7                                                | 880                                               | 2                         | 20                |
| Fe <sub>2</sub> -Z8-C                      | 80                                | 2.8                                                | 1141                                              | 2                         | 25                |
| Fe-MOF-100nm                               | 94                                | 4                                                  | 1140                                              | 1.7                       | 26                |
| Fe/Phen/Z8                                 | 80                                | 4                                                  | 910                                               | 1                         | 27                |

**Table S6.** The overall Fe content of Fe-N/MC and Fe-N/C-ref based on ICP-OES

| <b>Sample</b>     | <b>Total Fe<br/>(wt.%)</b> | <b>Fe (after acid treatment)<br/>(wt.%)</b> |
|-------------------|----------------------------|---------------------------------------------|
| <b>Fe-N/MC</b>    | 3.16                       | 2.76                                        |
| <b>Fe-N/C-ref</b> | 2.07                       | 1.48                                        |

**Table S7.** Comparison of the durability performance of PEMFCs using NPM cathode catalysts

| <b>Catalyst</b>                             | <b>Test environment</b>            | <b>Initial current density (mA cm<sup>-2</sup>)</b> | <b>Performance degradation rate</b> | <b>times</b> | <b>References</b> |
|---------------------------------------------|------------------------------------|-----------------------------------------------------|-------------------------------------|--------------|-------------------|
| <b>Fe-N/MC</b>                              | <b>H<sub>2</sub>-O<sub>2</sub></b> | <b>651</b>                                          | <b>42.3%</b>                        | <b>24h</b>   | <b>This work</b>  |
| Fe-ZIF'/CNT-1                               | H <sub>2</sub> -O <sub>2</sub>     | 615                                                 | 34%                                 | 30h          | 28                |
| Fe-N-C                                      | H <sub>2</sub> -Air                | 500                                                 | 58%                                 | 23h          | 29                |
| FeO <sub>x</sub> @GC-NOMC                   | H <sub>2</sub> -O <sub>2</sub>     | 440                                                 | 28.9%                               | 150h         | 30                |
| Fe/N/C-SCN                                  | H <sub>2</sub> -O <sub>2</sub>     | 1600                                                | 71.9%                               | 100h         | 21                |
| CFeHZ8@gC <sub>3</sub> N <sub>4</sub> - 950 | H <sub>2</sub> -O <sub>2</sub>     | 400                                                 | 51.1%                               | 8h           | 22                |
| ZIF-FA-CNT-p                                | H <sub>2</sub> -O <sub>2</sub>     | 1200                                                | 79.1%                               | 60h          | 25                |
| Fe/N/C(4mlm)-OAc                            | H <sub>2</sub> -O <sub>2</sub>     | 2600                                                | 80.3%                               | 35h          | 2                 |
| CeF3-Fe/N/C                                 | H <sub>2</sub> -O <sub>2</sub>     | 120                                                 | 46%                                 | 24h          | 16                |
| SA-3DNC                                     | H <sub>2</sub> -O <sub>2</sub>     | 380                                                 | 25%                                 | 20h          | 31                |
| C-FeZIF-1.44-950                            | H <sub>2</sub> -O <sub>2</sub>     | 1000                                                | 32.2%                               | 10h          | 32                |

## References

- [1] Zheng, L.; Dong, Y. Y.; Chi, B.; Cui, Z. M.; Deng, Y. J.; Shi, X. D.; Du, L.; Liao, S. J., UIO-66-NH<sub>2</sub>-Derived Mesoporous Carbon Catalyst Co-Doped with Fe/N/S as Highly Efficient Cathode Catalyst for PEMFCs. *Small* **2019**, *15* (4).
- [2] Li, Y. Y.; Zhang, P. Y.; Wan, L. Y.; Zheng, Y. P.; Qu, X. M.; Zhang, H. K.; Wang, Y. S.; Zaghbi, K.; Yuan, J. Y.; Sun, S. H.; Wang, Y. C.; Zhou, Z. Y.; Sun, S. G., A General Carboxylate-Assisted Approach to Boost the ORR Performance of ZIF-Derived Fe/N/C Catalysts for Proton Exchange Membrane Fuel Cells. *Adv Funct Mater* **2021**, *31* (15).
- [3] Ye, G. Y.; He, Q.; Liu, S. Q.; Zhao, K. M.; Su, Y. K.; Zhu, W. W.; Huang, R. J.; He, Z., Cage-confinement of gas-phase ferrocene in zeolitic imidazolate frameworks to synthesize high-loading and atomically dispersed Fe-N codoped carbon for efficient oxygen reduction reaction. *J Mater Chem A* **2019**, *7* (27), 16508-16515.
- [4] Lin, L.; Zhu, Q.; Xu, A. W., Noble-Metal-Free Fe-N/C Catalyst for Highly Efficient Oxygen Reduction Reaction under Both Alkaline and Acidic Conditions. *Journal of the American Chemical Society* **2014**, *136* (31), 11027-11033.
- [5] Li, Z. H.; Shao, M. F.; Zhou, L.; Zhang, R. K.; Zhang, C.; Wei, M.; Evans, D. G.; Duan, X., Directed Growth of Metal-Organic Frameworks and Their Derived Carbon-Based Network for Efficient Electrocatalytic Oxygen Reduction. *Advanced Materials* **2016**, *28* (12), 2337-2344.
- [6] Jiang, H. L.; Yao, Y. F.; Zhu, Y. H.; Liu, Y. Y.; Su, Y. H.; Yang, X. L.; Li, C. Z., Iron Carbide Nanoparticles Encapsulated in Mesoporous Fe-N-Doped Graphene-Like Carbon Hybrids as Efficient Bifunctional Oxygen Electrocatalysts. *Acs Appl Mater Inter* **2015**, *7* (38), 21511-21520.
- [7] Ferrero, G. A.; Preuss, K.; Marinovic, A.; Jorge, A. B.; Mansor, N.; Brett, D. J. L.; Fuentetaja, A. B.; Sevilla, M.; Titirici, M. M., Fe-N-Doped Carbon Capsules with Outstanding Electrochemical Performance and Stability for the Oxygen Reduction Reaction in Both Acid and Alkaline Conditions. *Acs Nano* **2016**, *10* (6), 5922-5932.
- [8] Zhang, W.; Xu, X.; Zhang, C.; Yu, Z.; Zhou, Y.; Tang, Y.; Wu, P.; Guo, S., 3D Space-Confined Pyrolysis of Double-Network Aerogels Containing In-Fe Cyanogel and Polyaniline: A New Approach to Hierarchically Porous Carbon with Exclusive Fe-N-x Active Sites for Oxygen Reduction Catalysis. *Small Methods* **2017**, *1* (8).
- [9] Cui, X. Y.; Yang, S. B.; Yan, X. X.; Leng, J. G.; Shuang, S.; Ajayan, P. M.; Zhang, Z. J., Pyridinic-Nitrogen-Dominated Graphene Aerogels with Fe-N-C Coordination for Highly Efficient Oxygen Reduction Reaction. *Adv Funct Mater* **2016**, *26* (31), 5708-5717.
- [10] Deng, Y. J.; Chi, B.; Tian, X. L.; Cui, Z. M.; Liu, E. S.; Jia, Q. Y.; Fan, W. J.; Wang, G. H.; Dang, D.; Li, M. S.; Zang, K. T.; Luo, J.; Hu, Y. F.; Liao, S. J.; Sun, X. L.; Mukerjee, S., g-C<sub>3</sub>N<sub>4</sub> promoted MOF derived hollow carbon nanopolyhedra doped with high density/fraction of single Fe atoms as an ultra-high performance non-precious catalyst towards acidic ORR and PEM fuel cells. *J Mater Chem A* **2019**, *7* (9), 5020-5030.
- [11] Zhu, Y. S.; Zhang, B. S.; Liu, X.; Wang, D. W.; Su, D. S., Unravelling the Structure of Electrocatalytically Active Fe-N Complexes in Carbon for the Oxygen Reduction Reaction. *Angew Chem Int Edit* **2014**, *53* (40), 10673-10677.
- [12] Deng, Y. J.; Dong, Y. Y.; Wang, G. H.; Sun, K. L.; Shi, X. D.; Zheng, L.; Li, X. H.; Liao, S. J., Well-Defined ZIF-Derived Fe-N Codoped Carbon Nanoframes as Efficient Oxygen Reduction Catalysts. *Acs Appl Mater Inter* **2017**, *9* (11), 9699-9709.
- [13] Yang, J.; Sun, H. Y.; Liang, H. Y.; Ji, H. X.; Song, L.; Gao, C.; Xu, H. X., A Highly Efficient Metal-Free Oxygen Reduction Electrocatalyst Assembled from Carbon Nanotubes and Graphene. *Advanced Materials* **2016**, *28* (23), 4606-4613.
- [14] Wu, Z. Y.; Xu, X. X.; Hu, B. C.; Liang, H. W.; Lin, Y.; Chen, L. F.; Yu, S. H., Iron Carbide Nanoparticles

- Encapsulated in Mesoporous Fe-N-Doped Carbon Nanofibers for Efficient Electrocatalysis. *Angew Chem Int Edit* **2015**, *54* (28), 8179-8183.
- [15] Qiao, M.; Wang, Y.; Wang, Q.; Hu, G.; Mamat, X.; Zhang, S.; Wang, S., Hierarchically Ordered Porous Carbon with Atomically Dispersed FeN<sub>4</sub> for Ultraefficient Oxygen Reduction Reaction in Proton-Exchange Membrane Fuel Cells. *Angew Chem Int Edit* **2020**, *59* (7), 2688-2694.
- [16] Yin, X.; Utetiwabo, W.; Sun, S. H.; Lian, Y. M.; Chen, R. J.; Yang, W., Incorporation of CeF<sub>3</sub> on single-atom dispersed Fe/N/C with oxophilic interface as highly durable electrocatalyst for proton exchange membrane fuel cell. *J Catal* **2019**, *374*, 43-50.
- [17] Chong, L. N.; Goenaga, G. A.; Williams, K.; Barkholtz, H. M.; Grabstanowicz, L. R.; Brooksbank, J. A.; Papandrew, A. B.; Elzein, R.; Schlaf, R.; Zawodzinski, T. A.; Zou, J. X.; Ma, S. Q.; Liu, D. J., Investigation of Oxygen Reduction Activity of Catalysts Derived from Co and Co/Zn Methyl-Imidazolate Frameworks in Proton Exchange Membrane Fuel Cells. *Chemelectrochem* **2016**, *3* (10), 1541-1545.
- [18] Chang, S. T.; Wang, C. H.; Du, H. Y.; Hsu, H. C.; Kang, C. M.; Chen, C. C.; Wu, J. C. S.; Yen, S. C.; Huang, W. F.; Chen, L. C.; Lin, M. C.; Chen, K. H., Vitalizing fuel cells with vitamins: pyrolyzed vitamin B12 as a non-precious catalyst for enhanced oxygen reduction reaction of polymer electrolyte fuel cells. *Energ Environ Sci* **2012**, *5* (1), 5305-5314.
- [19] Li, J.; Chen, M.; Cullen, D. A.; Hwang, S.; Wang, M.; Li, B.; Liu, K.; Karakalos, S.; Lucero, M.; Zhang, H.; Lei, C.; Xu, H.; Sterbinsky, G. E.; Feng, Z.; Su, D.; More, K. L.; Wang, G.; Wang, Z.; Wu, G., Atomically dispersed manganese catalysts for oxygen reduction in proton-exchange membrane fuel cells. *Nature Catalysis* **2018**, *1* (12), 935-945.
- [20] Yang, X. H.; Wang, Y. C.; Zhang, G. X.; Du, L.; Yang, L. J.; Markiewicz, M.; Choi, J. Y.; Chenitz, R.; Sun, S. H., SiO<sub>2</sub>-Fe/N/C catalyst with enhanced mass transport in PEM fuel cells. *Appl Catal B-Environ* **2020**, *264*.
- [21] Y.C. Wang, Y.J. Lai, L. Song, Z.Y. Zhou, J.G. Liu, Q. Wang, X.D. Yang, C. Chen, W. Shi, Y.P. Zheng, M. Rauf, S.G. Sun, S-Doping of an Fe/N/C ORR Catalyst for Polymer Electrolyte Membrane Fuel Cells with High Power Density, *Angew Chem Int Edit*, *54* (2015) 9907-9910
- [22] He, Y.; Hwang, S.; Cullen, D. A.; Uddin, M. A.; Langhorst, L.; Li, B.; Karakalos, S.; Kropf, A. J.; Wegener, E. C.; Sokolowski, J.; Chen, M.; Myers, D.; Su, D.; More, K. L.; Wang, G.; Litster, S.; Wu, G., Highly active atomically dispersed CoN<sub>4</sub> fuel cell cathode catalysts derived from surfactant-assisted MOFs: carbon-shell confinement strategy. *Energ Environ Sci* **2019**, *12* (1), 250-260.
- [23] Strickland, K.; Miner, E.; Jia, Q.; Tylus, U.; Ramaswamy, N.; Liang, W.; Sougrati, M.-T.; Jaouen, F.; Mukerjee, S., Highly active oxygen reduction non-platinum group metal electrocatalyst without direct metal-nitrogen coordination. *Nature Communications* **2015**, *6*.
- [24] Zhang, C.; Wang, Y. C.; An, B.; Huang, R. Y.; Wang, C.; Zhou, Z. Y.; Lin, W. B., Networking Pyrolyzed Zeolitic Imidazolate Frameworks by Carbon Nanotubes Improves Conductivity and Enhances Oxygen-Reduction Performance in Polymer-Electrolyte-Membrane Fuel Cells. *Advanced Materials* **2017**, *29* (4).
- [25] Liu, Q.; Liu, X.; Zheng, L.; Shui, J., The Solid-Phase Synthesis of an Fe-N-C Electrocatalyst for High-Power Proton-Exchange Membrane Fuel Cells. *Angew Chem Int Edit* **2018**, *57* (5), 1204-1208.
- [26] Uddin, A.; Dunsmore, L.; Zhang, H. G.; Hu, L. M.; Wu, G.; Litster, S., High Power Density Platinum Group Metal-free Cathodes for Polymer Electrolyte Fuel Cells. *Acs Appl Mater Inter* **2020**, *12* (2), 2216-2224.
- [27] Fu, X. G.; Zamani, P.; Choi, J. Y.; Hassan, F. M.; Jiang, G. P.; Higgins, D. C.; Zhang, Y. N.; Hoque, M. A.; Chen, Z. W., In Situ Polymer Graphenization Ingrained with Nanoporosity in a Nitrogenous Electrocatalyst Boosting the Performance of Polymer-Electrolyte-Membrane Fuel Cells. *Advanced Materials* **2017**, *29* (7).
- [28] Xia, D. S.; Tang, F.; Yao, X. Z.; Wei, Y. P.; Cui, Y. F.; Dou, M.; Gan, L.; Kang, F. Y., Seeded growth

of branched iron-nitrogen-doped carbon nanotubes as a high performance and durable non-precious fuel cell cathode. *Carbon* **2020**, *162*, 300-307.

- [29] F. Xiao, G.L. Xu, C.J. Sun, I. Hwang, M.J. Xu, H.W. Wu, Z.D. Wei, X.Q. Pan, K. Amine, M.H. Shao, Durable hybrid electrocatalysts for proton exchange membrane fuel cells, *Nano Energy*, **2020**, 77.
- [30] K. Wang, H.X. Chen, X.F. Zhang, Y.X. Tong, S.Q. Song, P. Tsiakaras, Y. Wang, Iron oxide@graphitic carbon core-shell nanoparticles embedded in ordered mesoporous N-doped carbon matrix as an efficient cathode catalyst for PEMFC, *Appl Catal B-Environ*, **2020**, 264.
- [31] Y.H. Qian, Q.T. Liu, E. Sarnello, C.H. Tang, M.L. Chng, J.L. Shui, T. Li, S.J. Pennycook, M. Han, D. Zhao, MOF-Derived Carbon Networks with Atomically Dispersed Fe-N-x Sites for Oxygen Reduction Reaction Catalysis in Acidic Media, *Acs Mater Lett*, **2019**, *1* (1), 37-43.
- [32] Y. Deng, B. Chi, J. Li, G. Wang, L. Zheng, X. Shi, Z. Cui, L. Du, S. Liao, K. Zang, J. Luo, Y. Hu, X. Sun, Atomic Fe-Doped MOF-Derived Carbon Polyhedrons with High Active-Center Density and Ultra-High Performance toward PEM Fuel Cells, *Adv Energy Mater*, **2019**, *9* (13).
